# Supplementary material
Source: HighWire-hosted journal article supplement (http://www.cmaj.ca/highwire/filestream/59191/field_highwire_adjunct_files/1/screen-wong-10-at.pdf)
Supplement: screen-wong-10-at.pdf [file screen-wong-10-at.pdf]

| <b>Appendix 10 (as supplied by the authors): Results of threshold analysis on the cost of interferon-free antiviral therapy</b>                                                                                                                                |                                                                     |                                                                                   |                                                                                    |
|----------------------------------------------------------------------------------------------------------------------------------------------------------------------------------------------------------------------------------------------------------------|---------------------------------------------------------------------|-----------------------------------------------------------------------------------|------------------------------------------------------------------------------------|
| <b><u>Age ranges</u></b>                                                                                                                                                                                                                                       | <b><u>Strategies</u></b>                                            | <b><u><math>\lambda</math>=\$50,000</u><br/><u>(ICER versus no screening)</u></b> | <b><u><math>\lambda</math>=\$100,000</u><br/><u>(ICER versus no screening)</u></b> |
| 25-34                                                                                                                                                                                                                                                          | No screening                                                        | -                                                                                 | -                                                                                  |
|                                                                                                                                                                                                                                                                | Screen & treat with G1: IFN-Free DAA<br>G2/3: SOF/RBV<br>G4/5/6: PR | \$133,220                                                                         | \$369,577                                                                          |
| 35-44                                                                                                                                                                                                                                                          | No screening                                                        | -                                                                                 | -                                                                                  |
|                                                                                                                                                                                                                                                                | Screen & treat with G1: IFN-Free DAA<br>G2/3: SOF/RBV<br>G4/5/6: PR | \$117,324                                                                         | \$331,607                                                                          |
| 45-54                                                                                                                                                                                                                                                          | No screening                                                        | -                                                                                 | -                                                                                  |
|                                                                                                                                                                                                                                                                | Screen & treat with G1: IFN-Free DAA<br>G2/3: SOF/RBV<br>G4/5/6: PR | \$116,636                                                                         | \$309,603                                                                          |
| 55-64                                                                                                                                                                                                                                                          | No screening                                                        | -                                                                                 | -                                                                                  |
|                                                                                                                                                                                                                                                                | Screen & treat with G1: IFN-Free DAA<br>G2/3: SOF/RBV<br>G4/5/6: PR | \$80,501                                                                          | \$230,433                                                                          |
| 25-64                                                                                                                                                                                                                                                          | No screening                                                        | -                                                                                 | -                                                                                  |
|                                                                                                                                                                                                                                                                | Screen & treat with G1: IFN-Free DAA<br>G2/3: SOF/RBV<br>G4/5/6: PR | \$112,145                                                                         | \$310,262                                                                          |
| 45-64                                                                                                                                                                                                                                                          | No screening                                                        | -                                                                                 | -                                                                                  |
|                                                                                                                                                                                                                                                                | Screen & treat with G1: IFN-Free DAA<br>G2/3: SOF/RBV<br>G4/5/6: PR | \$100,316                                                                         | \$273,847                                                                          |
| G1: genotype 1; G2/3: genotype 2 or 3; G4/5/6: genotype 4 or 5 or 6; PR = pegylated interferon plus ribavirin; SOF/RBV = sofosbuvir plus ribavirin; IFN-Free DAA = interferon-free direct-acting antiviral agents; ICER = incremental cost-effectiveness ratio |                                                                     |                                                                                   |                                                                                    |
